# Supplementary material for: DMR1 (CCM1/YGR150C) of Saccharomyces cerevisiae Encodes an RNA-Binding Protein from the Pentatricopeptide Repeat Family Required for the Maintenance of the Mitochondrial 15S Ribosomal RNA
Source: Oxford University Press journal article supplement (doi:10.1534/genetics.110.113969), 2010-02-02
Supplement: figures1.pdf [file figures1.pdf]

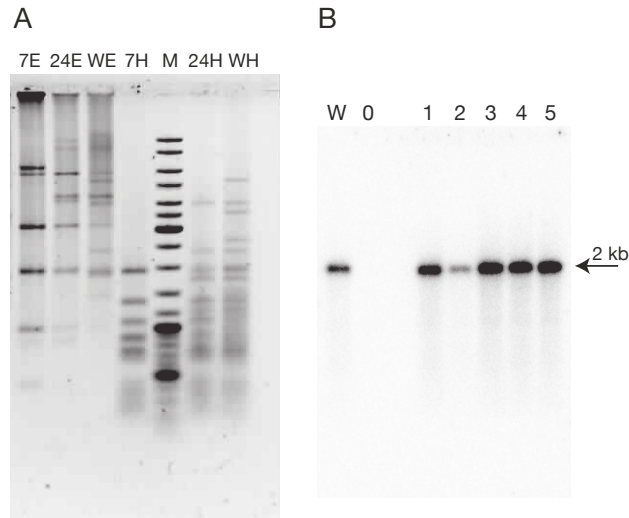

FIGURE S1.—Restriction and Southern analysis of different  $\rho^-$  clones expressing 15S rRNA. (A.) Mitochondrial DNA from two independent  $\rho^-$  clones expressing 15S rRNA, DPPR2/15S-7 (7) and DPPR2/15S-24 (24) and the wild-type  $\rho^+$  strain CW04 (W) was purified by centrifugation in CsCl/bis-benzimide gradient, digested with *EcoRV* (E) or *HapII* (H) and separated in a 0.7% agarose gel. M is the GeneRuler™ DNA Ladder Mix (Fermentas). Different restriction patterns of the two independent  $\rho^-$  clones are apparent. (B.) Southern blot analysis of total DNA from five independent  $\rho^-$  clones expressing 15S rRNA (1 to 5), the wild-type  $\rho^+$  strain CW04 (W) and a  $\rho^0$  negative control (0). DNA was digested with *HapII*, separated in a 0.7% agarose gel, blotted on a Hybond N+ membrane and probed with the 15S\_3ter oligonucleotide probe detecting the 3' fragment of the 15S rRNA gene. Presence of the 2kb fragment, known to contain the entire 15S rRNA gene (OSINGA *et al.* 1981) is detected in all the  $\rho^-$  clones.
