# Supplementary material for: DMR1 (CCM1/YGR150C) of Saccharomyces cerevisiae Encodes an RNA-Binding Protein from the Pentatricopeptide Repeat Family Required for the Maintenance of the Mitochondrial 15S Ribosomal RNA
Source: Oxford University Press journal article supplement (doi:10.1534/genetics.110.113969), 2010-02-02
Supplement: figures2.pdf [file figures2.pdf]

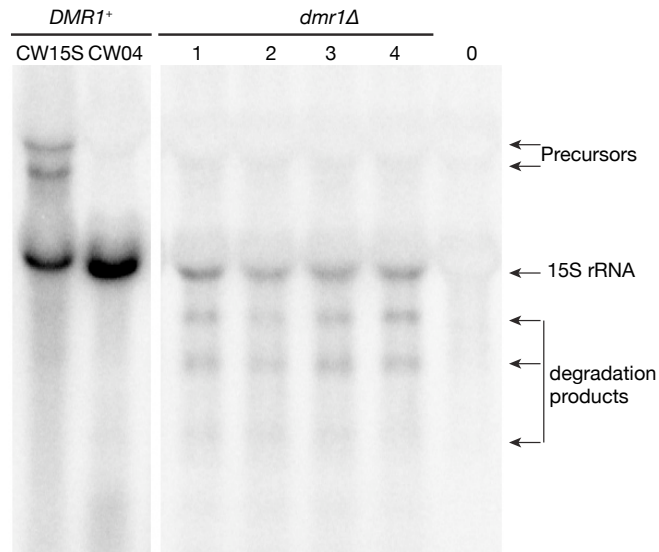

FIGURE S2.—Northern analysis of total RNA from different  $\rho^-$  clones expressing 15S rRNA. Total RNA from four independent *dmr1 $\Delta$*   $\rho^-$  clones expressing 15S rRNA (1 to 4), the wild-type  $\rho^+$  strain (CW04), a strain with the  $\rho^-$  genome expressing 15S rRNA introduced into wild-type nuclear background (CW15S), and a  $\rho^0$  negative control (0) was hybridized with an oligonucleotide probe recognizing the 3' fragment of the 15S rRNA (15S\_3ter). Neither the wild-type  $\rho^+$  strain (CW252), nor a strain with the same  $\rho^-$  genome expressing 15S rRNA introduced into wild-type nuclear background (CW15S), show any signs of degradation, while all the *dmr1 $\Delta$*   $\rho^-$  clones show a distinct degradation pattern, similar to the one observed in RNA preparations from purified mitochondria. The total amount of 15S rRNA fragments recognized by the probe in the *dmr1 $\Delta$*   $\rho^-$  clones is decreased in comparison with the *DMR1<sup>+</sup>* controls. The amounts of RNA in each lane were normalized using methylene blue staining of cytoplasmic rRNA bands on the blot.
